# Supplementary material for: Inflammation–nutrition score predicts prognosis of patients with resectable hepatocellular carcinoma
Source: Springer Nature journal article supplement (doi:10.1007/s10147-019-01402-4), 2019-04-24
Supplement: MOESM2 [file 16673850]

| Table S2 | Relationship between inﬂammatory prognostic scores and clinical variables | | | | | | | |  |  |  |  |  |  |  |  |  |  |
| --- | --- | --- | --- | --- | --- | --- | --- | --- | --- | --- | --- | --- | --- | --- | --- | --- | --- | --- |
|  |  |  | GPS |  | p value |  | mGPS |  | p value | NLR | | p value | PLR | | p value | PNI | | p value |
| Variables | | 0 | 1 | 2 | 0 | 1 | 2 | 0 | 1 | 0 | 1 | 0 | 1 |
| Age(yr) | |  |  |  |  |  |  |  |  |  |  |  |  |  |  |  |  |  |
| <54 |  | 267 | 35 | 1 | 0.13 | 274 | 28 | 1 | 0.13 | 299 | 4 | 0.13 | 278 | 25 | 1 | 272 | 31 | <0.001 |
| >=54 |  | 320 | 43 | 8 |  | 336 | 28 | 7 |  | 359 | 12 |  | 341 | 30 |  | 295 | 76 |  |
| Sex |  |  |  |  |  |  |  |  |  |  |  |  |  |  |  |  |  |  |
| Female | | 91 | 16 | 1 | 0.57 | 100 | 7 | 1 | 0.76 | 107 | 1 | 0.34 | 99 | 9 | 0.1 | 79 | 29 | 0.001 |
| Male |  | 496 | 62 | 8 |  | 510 | 49 | 7 |  | 551 | 15 |  | 520 | 46 |  | 488 | 78 |  |
| HBsAg | |  |  |  |  |  |  |  |  |  |  |  |  |  |  |  |  |  |
| Positive | | 498 | 65 | 8 | 0.9 | 520 | 43 | 8 | 0.1 | 562 | 9 | 0.005 | 531 | 40 | 0.01 | 478 | 94 | 0.38 |
| Negative | | 88 | 13 | 1 |  | 89 | 13 | 0 |  | 95 | 7 |  | 87 | 15 |  | 89 | 13 |  |
| Cirrhosis | |  |  |  |  |  |  |  |  |  |  |  |  |  |  |  |  |  |
| Positive | | 443 | 52 | 7 | 0.26 | 464 | 31 | 7 | 0.002 | 494 | 8 | 0.04 | 472 | 30 | 0.001 | 416 | 86 | 0.15 |
| Negative | | 144 | 26 | 2 |  | 146 | 25 | 1 |  | 164 | 8 |  | 147 | 25 |  | 151 | 21 |  |
| BMI |  |  |  |  |  |  |  |  |  |  |  |  |  |  |  |  |  |  |
| <=18.5 | | 24 | 3 | 0 | 1 | 25 | 2 | 0 | 1 | 26 | 1 | 0.48 | 24 | 3 | 0.48 | 21 | 6 | 0.42 |
| >18.5 |  | 563 | 75 | 9 |  | 585 | 54 | 8 |  | 632 | 15 |  | 595 | 52 |  | 546 | 101 |  |
| ALT |  |  |  |  |  |  |  |  |  |  |  |  |  |  |  |  |  |  |
| <50 |  | 468 | 65 | 7 | 0.79 | 486 | 48 | 6 | 0.56 | 524 | 16 | 0.05 | 491 | 49 | 0.11 | 456 | 84 | 0.62 |
| >=50 |  | 119 | 13 | 2 |  | 124 | 8 | 2 |  | 134 | 0 |  | 128 | 6 |  | 111 | 23 |  |
| Total serum bilirubin | | |  |  |  |  |  |  |  |  |  |  |  |  |  |  |  |  |
| <=20 |  | 534 | 68 | 7 | 0.22 | 555 | 48 | 6 | 0.11 | 597 | 12 | 0.06 | 560 | 49 | 0.81 | 513 | 96 | 0.86 |
| >20 |  | 53 | 10 | 2 |  | 55 | 8 | 2 |  | 61 | 4 |  | 59 | 6 |  | 54 | 11 |  |
| GGT |  |  |  |  |  |  |  |  |  |  |  |  |  |  |  |  |  |  |
| <60 |  | 357 | 30 | 4 | <0.001 | 369 | 19 | 3 | <0.001 | 382 | 9 | 1 | 366 | 25 | 0.06 | 337 | 54 | 0.08 |
| >=60 |  | 230 | 48 | 5 |  | 241 | 37 | 5 |  | 276 | 7 |  | 253 | 30 |  | 230 | 53 |  |
| AFP |  |  |  |  |  |  |  |  |  |  |  |  |  |  |  |  |  |  |
| <400 |  | 428 | 49 | 8 | 0.09 | 440 | 38 | 7 | 0.5 | 474 | 11 | 0.78 | 454 | 31 | 0.008 | 416 | 69 | 0.08 |
| >=400 |  | 159 | 29 | 1 |  | 170 | 18 | 1 |  | 184 | 5 |  | 165 | 24 |  | 151 | 38 |  |
| Albumin | |  |  |  |  |  |  |  |  |  |  |  |  |  |  |  |  |  |
| <40 |  | 157 | 49 | 9 | <0.001 | 180 | 27 | 8 | <0.001 | 206 | 9 | 0.05 | 192 | 23 | 0.13 | 114 | 101 | <0.001 |
| >=40 |  | 430 | 29 | 0 |  | 430 | 29 | 0 |  | 452 | 7 |  | 427 | 32 |  | 453 | 6 |  |
| Child-Pugh grade | | |  |  |  |  |  |  |  |  |  |  |  |  |  |  |  |  |
| A |  | 586 | 77 | 9 | 0.24 | 609 | 55 | 8 | 0.18 | 657 | 15 | 0.05 | 617 | 55 | 1 | 567 | 105 | 0.03 |
| B |  | 1 | 1 | 0 |  | 1 | 1 | 0 |  | 1 | 1 |  | 2 | 0 |  | 0 | 2 |  |
| BCLC stage | |  |  |  |  |  |  |  |  |  |  |  |  |  |  |  |  |  |
| 0/A |  | 405 | 25 | 4 | <0.001 | 422 | 8 | 4 | <0.001 | 426 | 8 | 0.48 | 408 | 26 | 0.02 | 372 | 62 | 0.32 |
| B |  | 153 | 47 | 5 |  | 159 | 42 | 4 |  | 198 | 7 |  | 180 | 25 |  | 167 | 38 |  |
| C |  | 29 | 6 | 0 |  | 29 | 6 | 0 |  | 34 | 1 |  | 31 | 4 |  | 28 | 7 |  |
| Tumour size | |  |  |  |  |  |  |  |  |  |  |  |  |  |  |  |  |  |
| <5 |  | 368 | 23 | 4 | <0.001 | 385 | 6 | 4 | <0.001 | 290 | 5 | 0.04 | 375 | 20 | 0.001 | 339 | 56 | 0.17 |
| >=5 |  | 219 | 55 | 5 |  | 225 | 50 | 4 |  | 268 | 11 |  | 244 | 35 |  | 228 | 51 |  |
| Tumour number | | |  |  |  |  |  |  |  |  |  |  |  |  |  |  |  |  |
| Solitary | | 500 | 69 | 9 | 0.35 | 519 | 51 | 8 | 0.23 | 563 | 15 | 0.49 | 528 | 50 | 0.32 | 485 | 93 | 0.77 |
| Multiple | | 87 | 9 | 0 |  | 91 | 5 | 0 |  | 95 | 1 |  | 91 | 5 |  | 82 | 14 |  |
| Tumour capsule | | |  |  |  |  |  |  |  |  |  |  |  |  |  |  |  |  |
| Complete | | 377 | 45 | 7 | 0.36 | 395 | 28 | 6 | 0.07 | 420 | 9 | 0.6 | 401 | 28 | 0.04 | 359 | 70 | 0.74 |
| None |  | 210 | 33 | 2 |  | 215 | 28 | 2 |  | 238 | 7 |  | 218 | 27 |  | 208 | 37 |  |
| Microvenous invasion | | |  |  |  |  |  |  |  |  |  |  |  |  |  |  |  |  |
| No |  | 438 | 36 | 5 | <0.001 | 449 | 25 | 5 | <0.001 | 470 | 9 | 0.26 | 448 | 31 | 0.01 | 408 | 71 | 0.25 |
| Yes |  | 149 | 42 | 4 |  | 161 | 31 | 3 |  | 188 | 7 |  | 171 | 24 |  | 159 | 36 |  |
| Vascular thrombus | | |  |  |  |  |  |  |  |  |  |  |  |  |  |  |  |  |
| No |  | 556 | 71 | 8 | 0.28 | 578 | 50 | 7 | 0.15 | 620 | 15 | 1 | 584 | 51 | 0.76 | 537 | 98 | 0.26 |
| Yes |  | 31 | 7 | 1 |  | 32 | 6 | 1 |  | 38 | 1 |  | 35 | 4 |  | 30 | 9 |  |
| Edmondson grade | | |  |  |  |  |  |  |  |  |  |  |  |  |  |  |  |  |
| I-II |  | 415 | 43 | 5 | 0.01 | 427 | 32 | 4 | 0.07 | 453 | 10 | 0.79 | 429 | 34 | 0.29 | 400 | 63 | 0.02 |
| III |  | 172 | 35 | 4 |  | 183 | 24 | 4 |  | 205 | 6 |  | 190 | 21 |  | 167 | 44 |  |

Abbreviations: HBsAg: hepatitis B surface antigen; BMI: Body Mass Index; ALT: alanine aminotransferase; GGT: Gamma Glutamyl Transferase; AFP: a-fetoprotein level; BCLC: Barcelona Clinic Liver Cancer Score;
